# Supplementary material for: A Variant PfCRT Isoform Can Contribute to Plasmodium falciparum Resistance to the First-Line Partner Drug Piperaquine
Source: PubMed Central journal article supplement (PMC5424201; doi:10.1128/mbio.00303-17), 2017-05-09
Supplement: mbo002173294st1.pdf [file mbo002173294st1.pdf]

**TABLE S1. Mean±SEM IC<sub>50</sub>, IC<sub>90</sub> and LD<sub>50</sub> values (nM) of the *pfcr*t-modified Dd2 lines. (page 1 of 3)**

| Line                                           | Dd2                   | Dd2 <sup>Dd2</sup>    | Dd2 <sup>Dd2+C101F CL1</sup> | Dd2 <sup>Dd2+C101F CL2</sup> |
|------------------------------------------------|-----------------------|-----------------------|------------------------------|------------------------------|
| <b>PPQ IC<sub>50</sub> (nM)</b>                | <b>14.9 ± 1.3</b>     | <b>15.8 ± 1.3</b>     | <b>N.D.</b>                  | <b>N.D.</b>                  |
| # assays                                       | 9                     | 9                     |                              |                              |
| <i>p</i> value vs Dd2 <sup>Dd2</sup>           | 0.43                  |                       |                              |                              |
| <b>PPQ IC<sub>90</sub> (nM)</b>                | <b>27.3 ± 1.1</b>     | <b>29.4 ± 1.7</b>     | <b>3941.5 ± 112.6</b>        | <b>4103.7 ± 141.8</b>        |
| # assays                                       | 9                     | 9                     | 11                           | 11                           |
| <i>p</i> value vs Dd2 <sup>Dd2</sup>           | 0.53                  |                       | <i>p</i> <0.0001             | <i>p</i> <0.0001             |
| <i>p</i> value vs Dd2                          |                       |                       | <i>p</i> <0.0001             | <i>p</i> <0.0001             |
| <i>p</i> value vs Dd2 <sup>Dd2+C101F CL1</sup> |                       |                       |                              | 0.85                         |
| <b>PPQ LD<sub>50</sub> (nM)</b>                | <b>57.4 ± 7.7</b>     | <b>64.7 ± 6.0</b>     | <b>182.1 ± 30.9</b>          | <b>163.6 ± 36.9</b>          |
| # assays                                       | 7                     | 9                     | 7                            | 7                            |
| <i>p</i> value vs Dd2 <sup>Dd2</sup>           | 0.34                  |                       | 0.0007                       | 0.0002                       |
| <i>p</i> value vs Dd2                          |                       |                       | 0.0012                       | 0.0006                       |
| <i>p</i> value vs Dd2 <sup>Dd2+C101F CL1</sup> |                       |                       |                              | 0.45                         |
| <b>CQ IC<sub>50</sub> (nM)</b>                 | <b>135.4 ± 15.9</b>   | <b>128.6 ± 15.6</b>   | <b>14.1 ± 1.3</b>            | <b>14.2 ± 1.5</b>            |
| # assays                                       | 7                     | 7                     | 7                            | 7                            |
| <i>p</i> value vs Dd2 <sup>Dd2</sup>           | 0.45                  |                       | 0.0006                       | 0.0006                       |
| <i>p</i> value vs Dd2                          |                       |                       | 0.0006                       | 0.0006                       |
| <i>p</i> value vs Dd2 <sup>Dd2+C101F CL1</sup> |                       |                       |                              | 0.78                         |
| <b>CQ IC<sub>90</sub> (nM)</b>                 | <b>215.1 ± 13.3</b>   | <b>205.1 ± 15.6</b>   | <b>32.9 ± 4.4</b>            | <b>32.7 ± 4.7</b>            |
| # assays                                       | 7                     | 7                     | 7                            | 7                            |
| <i>p</i> value vs Dd2 <sup>Dd2</sup>           | 0.38                  |                       | 0.0006                       | 0.0006                       |
| <i>p</i> value vs Dd2                          |                       |                       | 0.0006                       | 0.0006                       |
| <i>p</i> value vs Dd2 <sup>Dd2+C101F CL1</sup> |                       |                       |                              | 0.87                         |
| <b>md-CQ IC<sub>50</sub> (nM)</b>              | <b>850.7 ± 95.7</b>   | <b>811.5 ± 107.3</b>  | <b>56.7 ± 5.5</b>            | <b>58.6 ± 6.5</b>            |
| # assays                                       | 7                     | 7                     | 7                            | 7                            |
| <i>p</i> value vs Dd2 <sup>Dd2</sup>           | 0.78                  |                       | 0.0006                       | 0.0006                       |
| <i>p</i> value vs Dd2                          |                       |                       | 0.0006                       | 0.0006                       |
| <i>p</i> value vs Dd2 <sup>Dd2+C101F CL1</sup> |                       |                       |                              | 0.60                         |
| <b>md-CQ IC<sub>90</sub> (nM)</b>              | <b>1400.0 ± 162.1</b> | <b>1396.0 ± 165.6</b> | <b>145.3 ± 18.0</b>          | <b>149.4 ± 20.1</b>          |
| # assays                                       | 7                     | 7                     | 7                            | 7                            |
| <i>p</i> value vs Dd2 <sup>Dd2</sup>           | 0.78                  |                       | 0.0006                       | 0.0006                       |
| <i>p</i> value vs Dd2                          |                       |                       | 0.0006                       | 0.0006                       |
| <i>p</i> value vs Dd2 <sup>Dd2+C101F CL1</sup> |                       |                       |                              | 0.78                         |
| <b>md-ADQ IC<sub>50</sub> (nM)</b>             | <b>45.7 ± 2.3</b>     | <b>41.8 ± 2.9</b>     | <b>19.0 ± 1.5</b>            | <b>18.9 ± 1.6</b>            |
| # assays                                       | 8                     | 8                     | 8                            | 8                            |
| <i>p</i> value vs Dd2 <sup>Dd2</sup>           | 0.23                  |                       | 0.0002                       | 0.0002                       |
| <i>p</i> value vs Dd2                          |                       |                       | 0.0002                       | 0.0002                       |
| <i>p</i> value vs Dd2 <sup>Dd2+C101F CL1</sup> |                       |                       |                              | <i>p</i> >0.99               |
| <b>md-ADQ IC<sub>90</sub> (nM)</b>             | <b>74.3 ± 7.6</b>     | <b>67.6 ± 5.5</b>     | <b>30.1 ± 1.1</b>            | <b>31.9 ± 2.2</b>            |
| # assays                                       | 8                     | 8                     | 8                            | 8                            |
| <i>p</i> value vs Dd2 <sup>Dd2</sup>           | 0.32                  |                       | 0.0002                       | 0.0002                       |
| <i>p</i> value vs Dd2                          |                       |                       | 0.0002                       | 0.0002                       |
| <i>p</i> value vs Dd2 <sup>Dd2+C101F CL1</sup> |                       |                       |                              | 0.85                         |

TABLE S1 (cont.). Mean±SEM IC<sub>50</sub>, IC<sub>90</sub> and LD<sub>50</sub> values (nM) of the *pfcr*t-modified Dd2 lines. (page 2 of 3)

| Line                                           | Dd2                 | Dd2 <sup>Dd2</sup>  | Dd2 <sup>Dd2+C101F CL1</sup> | Dd2 <sup>Dd2+C101F CL2</sup> |
|------------------------------------------------|---------------------|---------------------|------------------------------|------------------------------|
| <b>QN IC<sub>50</sub> (nM)</b>                 | <b>213.2 ± 25.1</b> | <b>202.1 ± 22.1</b> | <b>105.6 ± 14.8</b>          | <b>106.4 ± 16.6</b>          |
| # assays                                       | 6                   | 6                   | 6                            | 6                            |
| <i>p</i> value vs Dd2 <sup>Dd2</sup>           | 0.57                |                     | 0.0087                       | 0.02                         |
| <i>p</i> value vs Dd2                          |                     |                     | 0.0087                       | 0.02                         |
| <i>p</i> value vs Dd2 <sup>Dd2+C101F CL1</sup> |                     |                     |                              | 0.90                         |
| <b>QN IC<sub>90</sub> (nM)</b>                 | <b>490.2 ± 39.2</b> | <b>477.6 ± 37.6</b> | <b>346.4 ± 41.4</b>          | <b>343.5 ± 46.4</b>          |
| # assays                                       | 6                   | 6                   | 6                            | 6                            |
| <i>p</i> value vs Dd2 <sup>Dd2</sup>           | 0.79                |                     | 0.06                         | 0.09                         |
| <i>p</i> value vs Dd2                          |                     |                     | 0.04                         | 0.06                         |
| <i>p</i> value vs Dd2 <sup>Dd2+C101F CL1</sup> |                     |                     |                              | 0.90                         |
| <b>ART IC<sub>50</sub> (nM)</b>                | <b>12.2 ± 1.0</b>   | <b>13.0 ± 1.0</b>   | <b>7.1 ± 0.6</b>             | <b>7.2 ± 0.6</b>             |
| # assays                                       | 8                   | 8                   | 8                            | 8                            |
| <i>p</i> value vs Dd2 <sup>Dd2</sup>           | 0.78                |                     | 0.0006                       | 0.0006                       |
| <i>p</i> value vs Dd2                          |                     |                     | 0.0006                       | 0.0006                       |
| <i>p</i> value vs Dd2 <sup>Dd2+C101F CL1</sup> |                     |                     |                              | 0.93                         |
| <b>ART IC<sub>90</sub> (nM)</b>                | <b>20.3 ± 1.4</b>   | <b>21.6 ± 0.9</b>   | <b>15.9 ± 1.3</b>            | <b>16.1 ± 1.3</b>            |
| # assays                                       | 8                   | 8                   | 8                            | 8                            |
| <i>p</i> value vs Dd2 <sup>Dd2</sup>           | 0.70                |                     | 0.0047                       | 0.0047                       |
| <i>p</i> value vs Dd2                          |                     |                     | 0.02                         | 0.03                         |
| <i>p</i> value vs Dd2 <sup>Dd2+C101F CL1</sup> |                     |                     |                              | p>0.99                       |
| <b>LMF IC<sub>50</sub> (nM)</b>                | <b>1.5 ± 0.1</b>    | <b>1.6 ± 0.1</b>    | <b>1.7 ± 0.2</b>             | <b>1.7 ± 0.2</b>             |
| # assays                                       | 7                   | 7                   | 7                            | 7                            |
| <i>p</i> value vs Dd2 <sup>Dd2</sup>           | 0.87                |                     | 0.87                         | 0.87                         |
| <i>p</i> value vs Dd2                          |                     |                     | 0.60                         | 0.97                         |
| <i>p</i> value vs Dd2 <sup>Dd2+C101F CL1</sup> |                     |                     |                              | 0.78                         |
| <b>LMF IC<sub>90</sub> (nM)</b>                | <b>7.2 ± 0.7</b>    | <b>7.3 ± 0.9</b>    | <b>7.7 ± 0.8</b>             | <b>7.3 ± 0.8</b>             |
| # assays                                       | 7                   | 7                   | 7                            | 7                            |
| <i>p</i> value vs Dd2 <sup>Dd2</sup>           | 0.87                |                     | 0.60                         | 0.87                         |
| <i>p</i> value vs Dd2                          |                     |                     | 0.69                         | 0.97                         |
| <i>p</i> value vs Dd2 <sup>Dd2+C101F CL1</sup> |                     |                     |                              | 0.87                         |
| <b>MFQ IC<sub>50</sub> (nM)</b>                | <b>17.1 ± 1.3</b>   | <b>17.7 ± 1.5</b>   | <b>15.1 ± 1.4</b>            | <b>16.7 ± 1.2</b>            |
| # assays                                       | 4                   | 4                   | 5                            | 5                            |
| <i>p</i> value vs Dd2 <sup>Dd2</sup>           | 0.83                |                     | 0.41                         | 0.71                         |
| <i>p</i> value vs Dd2                          |                     |                     | 0.41                         | 0.71                         |
| <i>p</i> value vs Dd2 <sup>Dd2+C101F CL1</sup> |                     |                     |                              | 0.41                         |
| <b>MFQ IC<sub>90</sub> (nM)</b>                | <b>42.4 ± 1.6</b>   | <b>43.1 ± 1.4</b>   | <b>39.1 ± 2.5</b>            | <b>42.5 ± 1.3</b>            |
| # assays                                       | 4                   | 4                   | 5                            | 5                            |
| <i>p</i> value vs Dd2 <sup>Dd2</sup>           | 0.66                |                     | 0.29                         | 0.71                         |
| <i>p</i> value vs Dd2                          |                     |                     | 0.41                         | 0.68                         |
| <i>p</i> value vs Dd2 <sup>Dd2+C101F CL1</sup> |                     |                     |                              | 0.15                         |
| <b>AMT IC<sub>50</sub> (μM)</b>                | <b>9.4 ± 0.7</b>    | <b>12.7 ± 1.2</b>   | <b>427.0 ± 22.4</b>          | <b>443.2 ± 26.8</b>          |
| # assays                                       | 7                   | 6                   | 7                            | 7                            |
| <i>p</i> value vs Dd2 <sup>Dd2</sup>           | 0.04                |                     | 0.001                        | 0.001                        |
| <i>p</i> value vs Dd2                          |                     |                     | 0.0006                       | 0.0006                       |
| <i>p</i> value vs Dd2 <sup>Dd2+C101F CL1</sup> |                     |                     |                              | 0.60                         |
| <b>AMT IC<sub>90</sub> (μM)</b>                | <b>33.8 ± 2.2</b>   | <b>63.4 ± 6.7</b>   | <b>691.0 ± 74.0</b>          | <b>704.5 ± 72.4</b>          |
| # assays                                       | 7                   | 6                   | 7                            | 7                            |
| <i>p</i> value vs Dd2 <sup>Dd2</sup>           | 0.001               |                     | 0.001                        | 0.001                        |
| <i>p</i> value vs Dd2                          |                     |                     | 0.0006                       | 0.0006                       |
| <i>p</i> value vs Dd2 <sup>Dd2+C101F CL1</sup> |                     |                     |                              | 0.45                         |
| <i>p</i> value vs Dd2 <sup>Dd2+C101F CL1</sup> |                     |                     |                              |                              |

**TABLE S1 (cont). Mean±SEM IC<sub>50</sub>, IC<sub>90</sub> and LD<sub>50</sub> values (nM) of the *pfcr*t-modified Dd2 lines. (page 3 of 3)**

| Line                                           | Dd2                 | Dd2 <sup>Dd2</sup>  | Dd2 <sup>Dd2+C101F CL1</sup> | Dd2 <sup>Dd2+C101F CL2</sup> |
|------------------------------------------------|---------------------|---------------------|------------------------------|------------------------------|
| <b>BSD IC<sub>50</sub> (nM)</b>                | <b>381.0 ± 18.2</b> | <b>404.3 ± 24.2</b> | <b>852.4 ± 28.3</b>          | <b>874.3 ± 28.5</b>          |
| # assays                                       | 8                   | 8                   | 8                            | 8                            |
| <i>p</i> value vs Dd2 <sup>Dd2</sup>           | 0.43                |                     | 0.0002                       | 0.0002                       |
| <i>p</i> value vs Dd2                          |                     |                     | 0.0002                       | 0.0002                       |
| <i>p</i> value vs Dd2 <sup>Dd2+C101F CL1</sup> |                     |                     |                              | 0.70                         |
| <b>BSD IC<sub>90</sub> (nM)</b>                | <b>802.4 ± 61.2</b> | <b>887.3 ± 64.6</b> | <b>1737.0 ± 112.9</b>        | <b>1812.0 ± 104.5</b>        |
| # assays                                       | 8                   | 8                   | 8                            | 8                            |
| <i>p</i> value vs Dd2 <sup>Dd2</sup>           | 0.43                |                     | 0.0002                       | 0.0002                       |
| <i>p</i> value vs Dd2                          |                     |                     | 0.0002                       | 0.0002                       |
| <i>p</i> value vs Dd2 <sup>Dd2+C101F CL1</sup> |                     |                     |                              | 0.63                         |

Mean±SEM LD<sub>50</sub>, IC<sub>50</sub> and IC<sub>90</sub> values are represented in nM (except for amantadine (AMT), which is represented in μM). LD<sub>50</sub>, IC<sub>50</sub> and IC<sub>90</sub> values were determined from 4–11 independent assays performed in duplicate. PPQ, piperazine; CQ, chloroquine; md-CQ, monodesethyl-chloroquine; md-ADQ, monodesethyl-amodiaquine; ART, artemisinin; LMF, lumefantrine; MFQ, mefloquine; BSD, blasticidin; QN, quinine. Statistical comparisons of the recombinant C101F-edited lines to the Dd2<sup>Dd2</sup> control were made using two-tailed Mann-Whitney *U* tests.

|               |    |                  |                   |                     |
|---------------|----|------------------|-------------------|---------------------|
| Shading code: | ns | * <i>p</i> <0.05 | ** <i>p</i> <0.01 | *** <i>p</i> <0.001 |
|---------------|----|------------------|-------------------|---------------------|
