# Supplementary material for: A Variant PfCRT Isoform Can Contribute to Plasmodium falciparum Resistance to the First-Line Partner Drug Piperaquine
Source: PubMed Central journal article supplement (PMC5424201; doi:10.1128/mbio.00303-17), 2017-05-09
Supplement: mbo002173294st2.pdf [file mbo002173294st2.pdf]

**TABLE S2. Representative parasitemias of the Dd2<sup>Dd2+C101F</sup> line at different piperazine concentrations.**

| PPQ (nM)        | Dd2 <sup>Dd2+C101F</sup> CL1 | Dd2 <sup>Dd2+C101F</sup> CL2 | PPQ (nM)        | Dd2 <sup>Dd2+C101F</sup> CL1 | Dd2 <sup>Dd2+C101F</sup> CL2 |
|-----------------|------------------------------|------------------------------|-----------------|------------------------------|------------------------------|
| 500             | 1.53                         | 1.31                         | 5000            | 0.60                         | 0.43                         |
| 250             | 1.77                         | 1.38                         | 2500            | 1.55                         | 1.15                         |
| 125             | 1.51                         | 1.26                         | 1250            | 1.66                         | 1.27                         |
| 62.5            | 1.70                         | 0.85                         | 625             | 1.44                         | 1.13                         |
| 31.3            | 3.16                         | 1.97                         | 312.5           | 1.39                         | 1.09                         |
| 15.6            | 3.99                         | 2.85                         | 156.3           | 1.37                         | 1.13                         |
| 7.8             | 4.34                         | 3.36                         | 78.1            | 1.00                         | 1.01                         |
| 3.9             | 4.44                         | 3.26                         | 39.1            | 0.79                         | 0.65                         |
| 2.0             | 4.50                         | 3.29                         | 19.5            | 1.57                         | 0.95                         |
| 1.0             | 4.54                         | 3.20                         | 9.8             | 3.07                         | 1.70                         |
| No drug control | 4.37                         | 3.24                         | No drug control | 4.42                         | 3.17                         |
| No drug control | 4.56                         | 3.27                         | No drug control | 4.38                         | 3.29                         |

Mean parasitemias of the Dd2<sup>Dd2+C101F</sup> parasite lines at different piperazine (PPQ) concentrations (2-fold dilutions), as determined from 72 h *in vitro* drug susceptibility assays. Parasitemias were determined using flow cytometry. Data represent parasitemias for 2 and 3 independent assays for drug assays starting with maximum PPQ concentrations of 500 nM and 5000 nM, respectively.
