# Supplementary material for: A Variant PfCRT Isoform Can Contribute to Plasmodium falciparum Resistance to the First-Line Partner Drug Piperaquine
Source: PubMed Central journal article supplement (PMC5424201; doi:10.1128/mbio.00303-17), 2017-05-09
Supplement: mbo002173294st4.pdf [file mbo002173294st4.pdf]

**TABLE S4. Mean±SEM IC<sub>50</sub> and IC<sub>90</sub> values (nM) of the FCB<sup>mdr1-KD</sup> and FCB line.**

| Line                            | FCB               | FCB <sup>mdr1-KD</sup> |
|---------------------------------|-------------------|------------------------|
| <b>PPQ IC<sub>50</sub> (nM)</b> | <b>12.1 ± 1.4</b> | <b>11.5 ± 0.7</b>      |
| # assays                        | 4                 | 4                      |
| <i>p</i> value vs FCB           |                   | 0.48                   |
| <b>PPQ IC<sub>90</sub> (nM)</b> | <b>24.2 ± 3.4</b> | <b>22.9 ± 2.6</b>      |
| # assays                        | 4                 | 4                      |
| <i>p</i> value vs FCB           |                   | 0.83                   |
| <b>LMF IC<sub>50</sub> (nM)</b> | <b>1.8 ± 0.5</b>  | <b>0.7 ± 0.03</b>      |
| # assays                        | 4                 | 4                      |
| <i>p</i> value vs FCB           |                   | 0.03                   |
| <b>LMF IC<sub>90</sub> (nM)</b> | <b>5.6 ± 0.1</b>  | <b>3.2 ± 0.2</b>       |
| # assays                        | 4                 | 4                      |
| <i>p</i> value vs FCB           |                   | 0.03                   |
| <b>MFQ IC<sub>50</sub> (nM)</b> | <b>12.1 ± 1.6</b> | <b>4.5 ± 0.5</b>       |
| # assays                        | 4                 | 4                      |
| <i>p</i> value vs FCB           |                   | 0.03                   |
| <b>MFQ IC<sub>90</sub> (nM)</b> | <b>28.2 ± 3.6</b> | <b>15.2 ± 2.0</b>      |
| # assays                        | 4                 | 4                      |
| <i>p</i> value vs FCB           |                   | 0.03                   |

Mean±SEM IC<sub>50</sub> and IC<sub>90</sub> values are represented in nM. These values were determined from 4 independent assays performed in duplicate. PPQ, piperazine; LMF, lumefantrine; MFQ, mefloquine. Statistical comparisons of the recombinant C101F-edited lines to the Dd2<sup>Dd2</sup> control were made using two-tailed Mann-Whitney *U* tests.

Shading code:

|    |                  |
|----|------------------|
| ns | * <i>p</i> <0.05 |
|----|------------------|
