# Supplementary material for: A Variant PfCRT Isoform Can Contribute to Plasmodium falciparum Resistance to the First-Line Partner Drug Piperaquine
Source: PubMed Central journal article supplement (PMC5424201; doi:10.1128/mbio.00303-17), 2017-05-09
Supplement: mbo002173294st5.pdf [file mbo002173294st5.pdf]

**TABLE S5. List of oligonucleotides used in this study.**

| <b>Name</b> | <b>Nucleotide Sequence (5'-3')</b>            | <b>Description</b>                     | <b>Lab Name</b> |
|-------------|-----------------------------------------------|----------------------------------------|-----------------|
| p1          | CCGAAACTCACAACTTTATT <u>TTT</u> ATGATTATG TTC | SDM C101F Fw                           | p3802           |
| p2          | GAACATAATCAT <u>AAA</u> AATAAAGTTGTGAGTTTCGG  | SDM C101F Rw                           | p3803           |
| p3          | CTCGAGATGGTTGGTTCGCTAAACTGC                   | <i>hdhfr</i> (+1-21) Xho1 Fw           | p3315           |
| p4          | TTGACCCTTATATATTCCACCCA                       | <i>Pfcr1</i> 3' UTR (+1285-1308)       | p3403           |
| p5          | CTTGGGCCCAAGTTGTA CTGCTTCTAAGC                | <i>Pfcr1</i> 5' UTR (-494-517) Apa1 Fw | p3404           |
| p6          | CTTATCGATAAGCAGAAGAACATATTAATAGGAATACTTAATTG  | <i>Pfcr1</i> exon 3 Cla1 Rv            | p3265           |
| p7          | CTTGAATTCGACCTTAACAGATGGCTCAC                 | <i>Pfcr1</i> exon 2 EcoRI Fw           | p3264           |
| p8          | CCGTTAATAATAAATACACGCAG                       | <i>Pfcr1</i> 5' UTR Fw                 | p4396           |
| p9          | GTGACATTTACAAAAATCATTTC CATG                  | <i>Pbcrt</i> 3' UTR Rv                 | p4413           |
| p10         | TCAAACATGACAAGGAAATAGT                        | <i>Pfcr1</i> exon 5 Fw                 | p2427           |

Red, bold and underlined nucleotides represent SNPs incorporated into the primer sequences for site-directed mutagenesis.
